# Supplementary material
Source: Springer Nature journal article supplement (https://www.springermedizin.de/resource/supplementary/12936_2013_3707_MOESM2_ESM.pdf/9545166)
Supplement: MOESM2 [file 9545166]

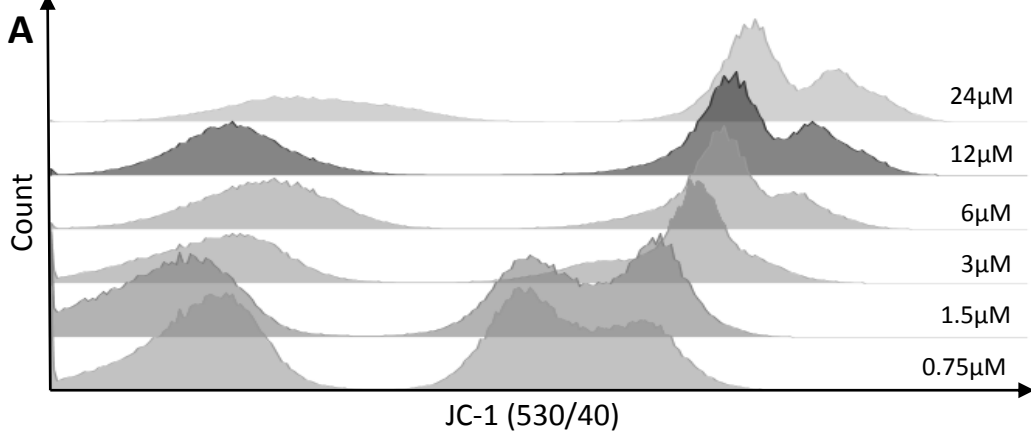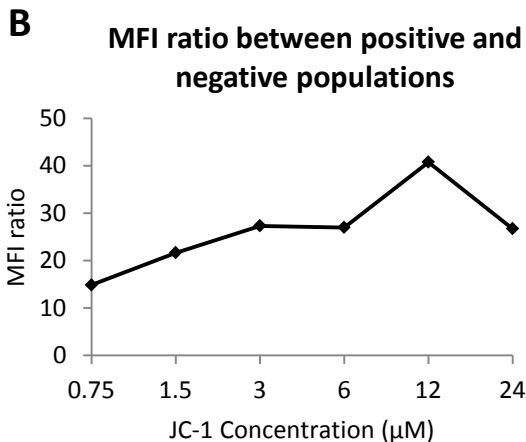

**Additional file 2 - Optimization of JC-1 staining**

A blood sample was taken from a *P. chabaudi adami* DS infected mouse and incubated with different concentrations of JC-1. Cells were analyzed by flow cytometry (A), and the optimal staining concentration was 12 $\mu$ M as determined by the ratio of the mean fluorescence intensity (MFI) of the JC-1 positive population compared to the negative population (B).
